# Supplementary material
Source: PubMed Central journal article supplement (PMC3522256)
Supplement: supp_M112.410324_jbc.M112.410324-1.pdf [file supp_M112.410324_jbc.M112.410324-1.pdf]

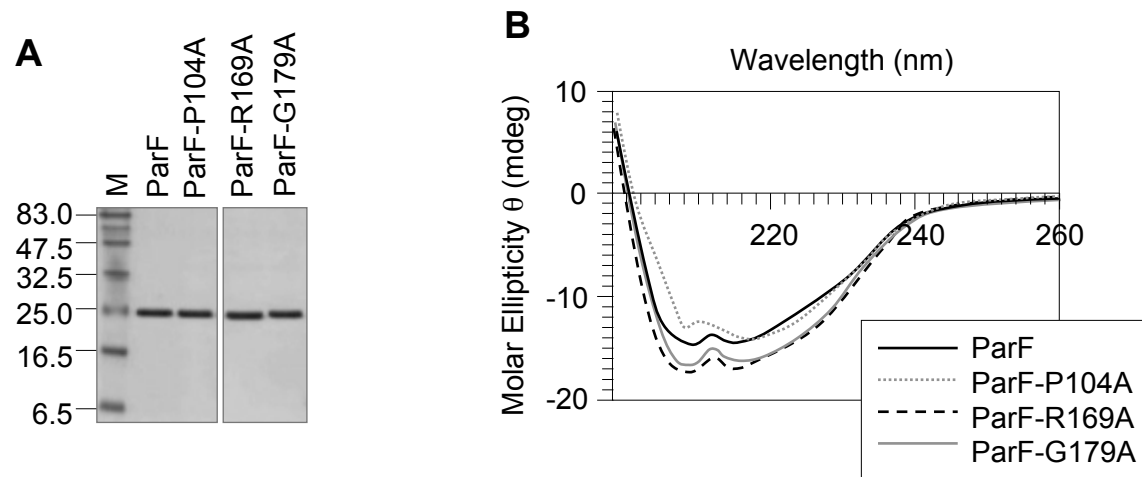

**Fig. S1. (A)** SDS-PAGE analysis of wild-type ParF and ParF-P104A, ParF-R169A and ParF-G179A proteins. Sizes of molecular weight markers (M) are indicated on the left (kDa). **(B)** Far UV circular dichroism spectra of wild-type ParF, ParF-P104A, ParF-R169A and ParF-G179A. The differences in the spectra between wild-type and mutated proteins are within the reproducibility limits of the technique.
