# Supplementary material
Source: PubMed Central journal article supplement (PMC3522256)
Supplement: supp_M112.410324_jbc.M112.410324-4.pdf [file supp_M112.410324_jbc.M112.410324-4.pdf]

**Table S1. Summary of wild-type ParF and mutant ParF<sup>H</sup> protein properties<sup>a</sup>**

| <b>Property</b>                    | <b>ParF</b> | <b>ParF<sup>H</sup></b> |
|------------------------------------|-------------|-------------------------|
| ATPase activity                    | +++         | +++++                   |
| ATP binding                        | +++         | ++                      |
| ATPase stimulation by ParG         | +++         | -                       |
| Self-association (two hybrid)      | +++         | +++                     |
| Interaction with ParG (two hybrid) | +++         | +++                     |
| Autopolymerization                 | +++         | +++++                   |
| Polymerization inhibition by ADP   | +++         | +++                     |
| Polymerization stimulation by ATP  | +++         | -                       |
| Polymerization stimulation by ParG | +++         | +++                     |
| Segrosome assembly                 | +++         | +                       |

<sup>a</sup>Levels of ParF<sup>H</sup> activity are indicated relative to wild-type activity which is shown as +++
